1 **Uncharacteristic task-evoked pupillary responses implicate atypical locus**  
2 **coeruleus activity in autism**

3  
4  
5 **Abbreviated Title:** Atypical task-evoked pupillary responses in autism  
6

7  
8 Michael C. Granovetter<sup>\*1,2,3</sup>, Charlie S. Burlingham<sup>4</sup>, Nicholas M. Blauch<sup>2</sup>, Nancy J. Minshew<sup>5</sup>,  
9 David J. Heeger<sup>4,6</sup>, & Marlene Behrmann<sup>1,2</sup>  
10

11  
12 <sup>1</sup>Department of Psychology, Carnegie Mellon University, Pittsburgh, PA 15213, USA

13 <sup>2</sup>Carnegie Mellon Neuroscience Institute, Carnegie Mellon University, Pittsburgh, PA 15213,  
14 USA

15 <sup>3</sup>School of Medicine, University of Pittsburgh, Pittsburgh, PA 15213, USA

16 <sup>4</sup>Department of Psychology, New York University, New York, NY 10003, USA

17 <sup>5</sup>Department of Psychiatry, University of Pittsburgh, Pittsburgh, PA 15213, USA

18 <sup>6</sup>Center for Neural Science, New York University, New York, NY 10003, USA  
19

20  
21 \*Correspondence: [granovetter@cmu.edu](mailto:granovetter@cmu.edu)  
22

23  
24 **Number of Pages:** 33

25 **Number of Figures:** 6

26 **Number of Tables:** 4

27 **Number of Words for Abstract:** 250

28 **Number of Words for Introduction:** 631

29 **Number of Words for Discussion:** 1500  
30

31  
32 **Conflict of Interest Statement:** The authors declare no competing financial interests.  
33

34  
35 **Acknowledgements:** This research was supported by Award Numbers T32GM008208 and  
36 T32GM081760 from the National Institute of General Medical Sciences to MCG and a grant  
37 from the Simons Foundation Autism Research Initiative to MB and DH. The content is solely the  
38 responsibility of the authors and does not necessarily represent the official view of the National  
39 Institute of General Medical Sciences or the National Institutes of Health. The authors thank  
40 Drs. Yael Niv and Eran Eldar for their initial discussions that stimulated the early framework of  
41 this study. The authors also thank Dr. Shaun E. Eack, Patricia J. McCarroll, and Michelle Perrin  
42 for assisting with recruitment and John J. Markiewicz for his organization of the  
43 neuropsychological testing data. The authors also thank Drs. Ilan Dinstein and Eran Eldar for  
44 input on the study design, and Drs. Ilan Dinstein and Sarah M. Haigh, whose experiment code  
45 was adapted for the study task. The authors also thank Dr. Timothy Verstynen and Madhumita  
46 Harish for input on the analyses. Finally, the authors thank the participants for making this  
47 research possible.  
48  
49  
50  
51

52 **Abstract**

53 Autism spectrum disorder (ASD) is characterized partly by atypical attentional  
54 engagement, such as hypersensitivity to environmental stimuli. Attentional engagement is  
55 known to be regulated by the locus coeruleus (LC). Moderate baseline LC activity globally  
56 dampens neural responsivity and is associated with adaptive deployment and narrowing of  
57 attention to task-relevant stimuli. In contrast, increased baseline LC activity enhances neural  
58 responsivity across cortex and widening of attention to environmental stimuli regardless of their  
59 task relevance. Given attentional atypicalities in ASD, this study is the first to evaluate whether  
60 individuals with ASD exhibit a different profile of LC activity compared to typically developing  
61 controls under different attentional task demands. Males and females with ASD and age- and  
62 gender-matched controls participated in a one-back letter detection test while task-evoked  
63 pupillary responses—an established inverse correlate for baseline LC activity—were recorded.  
64 Participants completed this task in two conditions, either in the absence or presence of  
65 distractor auditory tones. Compared to controls, individuals with ASD evinced atypical pupillary  
66 responses in the presence versus absence of distractors. Notably, this atypical pupillary profile  
67 was evident despite the fact that both groups exhibited equivalent task performance. Moreover,  
68 between-group differences in pupillary responses were observed only in response to task-  
69 relevant and not to task-irrelevant stimuli, providing confirmation that the group differences are  
70 specifically associated with distinctions in LC activity. These findings suggest that individuals  
71 with ASD show atypical modulation of LC activity with changes in attentional demands, offering  
72 a possible mechanistic and neurobiological account for attentional atypicalities in ASD.

73

74

75

76

77

78 **Significance Statement**

79           Individuals with autism spectrum disorder (ASD) exhibit atypical attentional behaviors,  
80 such as environmental hypersensitivity and atypical fixedness, but the neural mechanism  
81 underlying these behaviors remains elusive. One candidate mechanism is atypical locus  
82 coeruleus (LC) activity, as the LC has a critical role in attentional modulation. Elevated LC  
83 activity is associated with environmental exploration, while moderate LC activity is associated  
84 with focused attention on relevant stimuli. This study shows that, under tightly controlled  
85 conditions, task-evoked pupil responses—an LC activity proxy—are lower in individuals with  
86 ASD than in controls, but only in the presence of task-irrelevant stimuli. This suggests that  
87 individuals with ASD evince atypical modulation of LC activity in accordance with changes in  
88 attentional demands, offering a mechanistic account for attentional atypicalities in ASD.

89

90

91

92

93

94

95

96

97

98

99

100

101

102

103

## 104 **Introduction**

105           Autism spectrum disorder (ASD) is a neurodevelopmental condition characterized by  
106 atypicalities in social, sensory, and motor behaviors, with unclear neural underpinnings (Lord et  
107 al., 2018). The diversity of cognitive behaviors implicated in ASD suggests a possible global  
108 disruption in the homeostasis of excitatory-inhibitory (E-I) neural activity (Sur and Rubenstein,  
109 2005; Robertson et al., 2013; Dinstein et al., 2015; Rosenberg et al., 2015). Specifically, an  
110 inability to modulate neural gain—the likelihood of excitatory versus inhibitory output from a  
111 given input (Servan-Schreiber et al., 1990)—could result in increased variability in neural  
112 responsivity (Rosenberg et al., 2015). Consistent with this account, functional magnetic  
113 resonance imaging (fMRI) studies have demonstrated that individuals with ASD exhibit higher  
114 intra-individual variability of stimulus-evoked hemodynamic responses in sensory cortical areas  
115 compared to controls (Dinstein et al., 2012; Haigh et al., 2015). This neural variability may be  
116 related to or be a product of an inability to regulate neural gain globally.

117           The locus coeruleus (LC) globally regulates neural gain in association with cognitive task  
118 engagement (that is, deployment of attention to task-relevant versus distractor stimuli; Aston-  
119 Jones and Cohen, 2005; Eldar et al., 2013). With moderate tonic (baseline) LC activity, phasic  
120 responses can be elicited specifically in association with decisions executed on a task, and this  
121 mode of activity correlates with increased task engagement. However, with higher tonic LC  
122 activity, phasic responses in association with decision processes are weaker, and this mode of  
123 activity correlates with decreased task engagement and increased distractibility (Aston-Jones  
124 and Cohen, 2005; Gilzenrat et al., 2010). Furthermore, with high tonic LC activity, neural gain is  
125 increased throughout cortex, such that neural responsivity is arbitrarily and globally elevated  
126 (Aston-Jones and Cohen, 2005).

127           If individuals with ASD were to exhibit higher tonic LC activity than controls, with  
128 consequent increased neural sensitivity throughout cortex (Aston-Jones and Cohen, 2005; Eldar  
129 et al., 2013), this might explain the unreliability of neural responses to sensory stimuli in

130 individuals with ASD (Dinstein et al., 2012; Haigh et al., 2015). In fact, individuals with ASD are  
131 known to exhibit elevated tonic pupil sizes (Anderson and Colombo, 2009; Anderson et al.,  
132 2013; Blaser et al., 2014), and pupil size has been shown to correlate with LC activity in  
133 nonhuman primates (Aston-Jones et al., 1994; Joshi et al., 2016). Despite the multiplicity of  
134 provocative findings, however, no study has clearly demonstrated whether individuals with ASD  
135 evince an atypical LC profile under different attentional demands. A further desideratum of such  
136 a study would be to demonstrate differences in LC profiles when behavioral performance is  
137 comparable between ASD participants and controls—such an outcome would reveal an inherent  
138 alteration in LC activity rather than any physiological differences that might be a direct  
139 consequence of differences in behavior.

140         This study examines whether individuals with ASD exhibit higher tonic LC activity  
141 compared to typically developing controls under different attentional demands, by exploiting  
142 phasic pupillary responses as a signature of tonic LC activity. The phasic pupillary response to  
143 task decisions is an ideal readout of tonic LC activity because it is specifically associated with  
144 LC-mediated processing and allows for between-group comparisons that are not confounded by  
145 unrelated individual differences in pupil size (Aston-Jones and Cohen, 2005; Eldar et al., 2013).  
146 Here, adults with and without ASD performed a one-back letter detection task either in the  
147 absence or presence of an auditory distractor. Typically developing individuals, who can flexibly  
148 modulate LC activity in the context of attentional demands, are expected to exhibit greater  
149 pupillary responses associated with task responses in the presence versus absence of  
150 distractors. If, on the other hand, individuals with ASD demonstrate consistently higher tonic LC  
151 activity, task-relevant phasic pupillary responses would be expected to be reduced relative to  
152 controls' only in the presence versus absence of distractors and not adapted to the specifics of  
153 the task conditions.

154

155

156 **Methods**

157 Subject Details

158 Twenty-six individuals with ASD and twenty-six age- and gender-matched controls were  
 159 initially recruited and participated. The diagnosis of participants with ASD was confirmed by an  
 160 expert clinician at the Center for Excellence in Autism Research at the University of Pittsburgh,  
 161 and controls were recruited from the local Pittsburgh community. Descriptive statistics on the  
 162 Autism Diagnostic Observation Schedule (ADOS) and Wechsler Abbreviated Scale of  
 163 Intelligence (WASI) for participants with ASD are described in Table 1.

164 **Table 1.** Clinical metrics of those participants with ASD.

|                        | Median | MAD <sup>&amp;</sup> | Minimum | Maximum |
|------------------------|--------|----------------------|---------|---------|
| ADOS-LaCo <sup>*</sup> | 4.0    | 1.48                 | 2       | 8       |
| ADOS-RSI <sup>^</sup>  | 7.0    | 1.48                 | 4       | 12      |
| ADOS-<br>LaCo+RSI      | 11.0   | 2.97                 | 7       | 17      |
| ADOS-RRB <sup>#</sup>  | 2.0    | 1.48                 | 0       | 6       |
| VIQ <sup>+</sup>       | 115.0  | 8.90                 | 91      | 141     |
| PIQ <sup>%</sup>       | 119.0  | 20.76                | 81      | 134     |
| FSIQ <sup>@</sup>      | 113.0  | 19.27                | 86      | 134     |

165 \*LaCo, Language and Communication.  
 166 ^RSI, Reciprocal Social Interaction.  
 167 #RRB, Restricted and Repetitive Behaviors.  
 168 +VIQ, Verbal Intelligence Quotient.  
 169 %PIQ, Performance Intelligence Quotient.  
 170 @FSIQ, Full Scale IQ.  
 171 &MAD, median absolute deviation.

172  
 173 Three individuals with ASD and two controls were not included in the data analyses  
 174 because they did not complete both experimental task conditions (n = 3 participants with ASD, n

175 = 1 control) or because their data was discarded based on artifacts in the data and/or excessive  
176 blinks described below (n = 1 control).

177 In recruitment, groups were matched by age, gender, and handedness (confirmed with  
178 the Edinburgh Handedness Inventory; Oldfield, 1971). To determine whether these  
179 characteristics were comparable between groups, a logistic regression model to predict group  
180 membership was fitted with these features as predictors. Group could not be predicted from a  
181 participant's age ( $z = 1.63$ ,  $p = 0.10$ ), gender ( $z = 0.05$ ,  $p = 0.96$ ), or handedness ( $z = 0.16$ ,  $p =$   
182  $0.88$ ), indicating comparability of the groups on these variables. See Tables 2 and 3 for  
183 descriptive statistics of these characteristics.

184 **Table 2.** Age and handedness of participants, by group.

|                      | Median |       | MAD   |       | Minimum |        | Maximum |        |
|----------------------|--------|-------|-------|-------|---------|--------|---------|--------|
|                      | ASD    | Con.  | ASD   | Con.  | ASD     | Con.   | ASD     | Con.   |
| Age (yr)             | 29.0   | 25.5  | 8.90  | 5.19  | 21      | 21     | 49      | 47     |
| Handedness<br>(EHI#) | 80.00  | 70.00 | 29.65 | 36.19 | -70.00  | -85.71 | 100.00  | 100.00 |

185 EHI: Edinburgh Handedness Inventory ranges from -100 (left-handed dominance) to +100  
186 (right-handed dominance; Oldfield, 1971). Con., control.

187  
188 Participants completed questions about additional variables that might affect  
189 pupillometry measurements. As caffeine intake can affect pupil size (Abokyi et al., 2017),  
190 participants were asked about their caffeine intake on the same day of the study session.  
191 Participants also listed the medications they were taking, and the UpToDate database (Wolters  
192 Kluwer) was used to determine which, if any, medications interact with the adrenergic system.  
193 Finally, whether a participant was wearing eyeglasses was noted as this could potentially affect  
194 pupillometry recordings. A logistic regression model to predict group was fitted with these  
195 features as predictors. Group membership was predicted by use of adrenergic-related  
196 medication ( $z = 3.16$ ,  $p < 0.01$ ), but not by caffeine intake ( $z = 1.37$ ,  $p = 0.17$ ) or wearing

197 eyeglasses ( $z = 0.16$ ,  $p = 0.87$ ; Table 3). The effect of medication use was thus accounted for in  
198 the analyses described below.

199 **Table 3.** Percentages of participants (by group) who were female, had consumed caffeine on  
200 the day of the study session, were currently taking medications that interact with the adrenergic  
201 system, and wore eyeglasses.

|                           | ASD    | Control |
|---------------------------|--------|---------|
| Female                    | 8.70%  | 8.33%   |
| Caffeine                  | 43.48% | 54.17%  |
| Adrenergic Medication(s)* | 56.52% | 4.17%   |
| Eyeglasses                | 52.17% | 41.67%  |

202 \*, significant predictor of group.

203  
204 The Carnegie Mellon University Institutional Review Board reviewed and approved this  
205 research, and all participants provided informed consent.

206

## 207 Experimental Design and Statistical Analyses

### 208 *Task Design*

209 Participants' heads were positioned in a chinrest at a distance of approximately 60 cm  
210 from an approximately 38-by-31 cm computer monitor. The luminance and contrast settings of  
211 the monitor, as well as the ambient lighting in the room, were approximately constant throughout  
212 the experimental session and across participants. Task stimuli were presented using the  
213 Psychophysics Toolbox (Brainard, 1997) in MATLAB (MathWorks), and participants completed  
214 two versions of the task: without and with accompanying distractors.

215 The luminance of all stimuli was comparable to the background: specifically, the  $L^*$  value  
216 of the CIELAB color space (McGuire, 1992) was approximately equal for all colors in the task  
217 display. On a gray (CIELAB = [5776.9 0 0]) background, participants viewed a green (CIELAB =



218 [5777 -4812.8 4645.1]) circle positioned at the center of the screen. A set of 15 lower-case gray  
219 (CIELAB = [5776.9 0 0]) letters randomly appeared one at a time at a frequency of 2 Hz within  
220 the circle. Participants were instructed to indicate, using a keyboard press, each instance in  
221 which a consecutive letter repeat occurred. To provide feedback to participants, when a key was  
222 pressed in the second following a consecutive letter repetition, the letter on display became  
223 purple (CIELAB = [5772.4 3020.8 -5570]) for a 0.5 s duration subsequent to the key press. For  
224 all other key presses, the letters became red (CIELAB = [5780.3 5857.9 5501.7]) for a 0.5 s  
225 duration subsequent to the key press (Figure 1). While letter presentation was random, a pair of  
226 consecutive letters would not repeat within a 6-s interval. The letters were presented in the  
227 same order to all participants, and out of a total of approximately 1584 letter presentations,  
228 there were 54 total consecutive letter repetitions. This constituted the no-distractor condition.

229 Participants then completed the same task, but this time in the presence of distractor  
230 auditory stimuli, following a task design adapted from prior studies (Dinstein et al., 2012; Haigh  
231 et al., 2015). As the participants performed the same letter-repeat task, 11 600-Hz tones were  
232 played through a headset, each tone lasting for 0.15 s, with 0.15-s intervals between tones.  
233 Initiation of the 11 tones was separated by a random intertrial interval, ranging between 6-10 s  
234 to prevent participants from predicting the onset of the tones, and the timing of tone onsets was  
235 not associated with letter presentations or repeats. During this block, a total of approximately  
236 1607 letters were presented, with 65 total consecutive letter repetitions.

237 Each of the two task conditions consisted of 3 blocks of letter presentations, with breaks  
238 in-between.

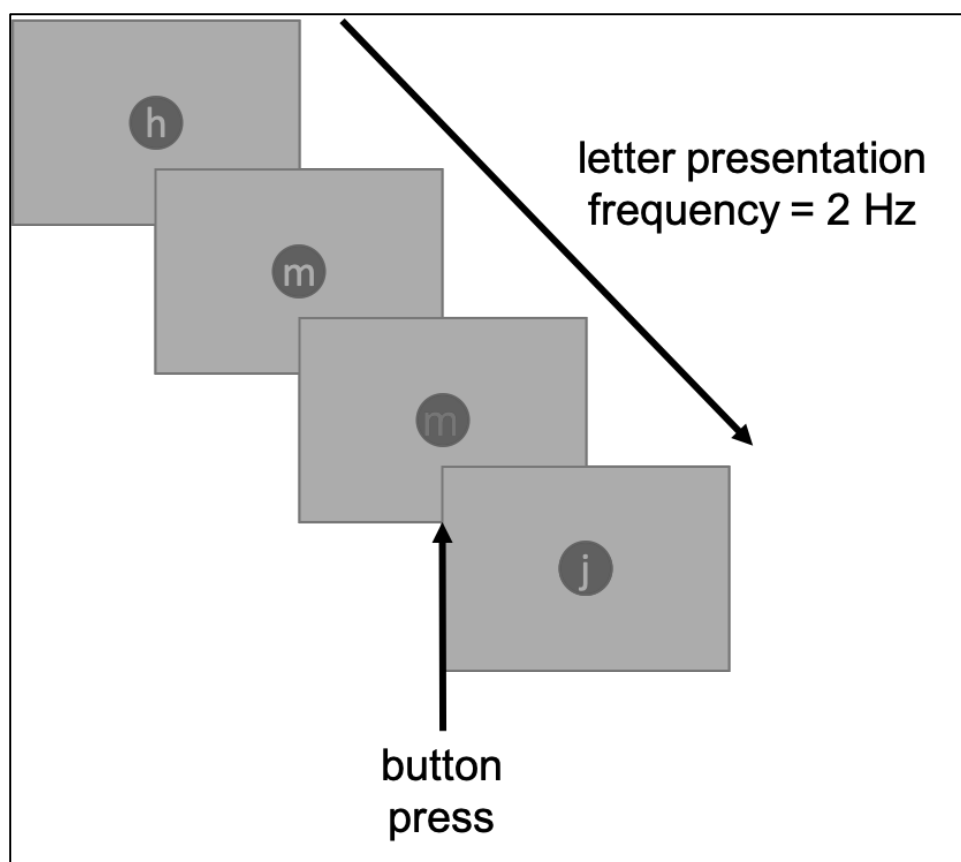

239  
240 **Figure 1.** Schematic of the one-back letter detection task. Participants viewed individual  
241 presentations of letters at a rate of 2 Hz and were instructed to press a button upon observing a  
242 consecutive letter repeat. For a duration of 0.5 s, letters became purple or red in response to a  
243 correct or incorrect button press, respectively. The visual display was isoluminant throughout  
244 the task session. In the first half of the experiment, participants performed the task in the  
245 absence of distractor stimuli. In the second half, participants were exposed to series of tones  
246 played temporally independent of the task sequence.  
247

#### 248 *Eye-tracking*

249 Pupil area and coordinates were measured with the EyeLink 1000 (SR Research,  
250 Ottawa, Canada; <http://www.sr-research.com/>) at a sampling rate of 1000 Hz. The eye-tracker  
251 was positioned below the computer monitor and was angled to record measurements from a  
252 single eye. A 3- or 5-point display grid was used for calibration, conducted prior to each  
253 experimental block. Thresholds for pupil detection were adapted for each participant due to  
254 individual differences between participants, such as participants' needs to wear glasses or  
255 contact lenses, eye color, and eye size. To determine if these parameters of the eye-tracker

256 were comparable between the groups, a logistic regression model to predict group was fitted  
257 with the thresholds for pupil and cornea detection as predictors. Neither pupil detection  
258 threshold (ASD: median = 80.00, median absolute deviation (MAD) = 7.41; Control: median =  
259 80.00, MAD = 7.41;  $z = 1.47$ ,  $p = 0.14$ ) nor cornea detection threshold (ASD: median = 250.00,  
260 MAD = 0; Control: median = 250.00, MAD = 0;  $z = 0.01$   $p = 0.99$ ) was predictive of group.

261 The pupillometry data were preprocessed using custom in-house scripts in MATLAB  
262 version 9.5.0 (MathWorks), as well as adapted blink/artifact interpolation code (Urai et al.,  
263 2017). Pupil area was converted to pupil diameter, taking into account the fact that the eye-  
264 tracker used a centroid-fitting model in detecting the pupil. Instances in which the eye-tracker  
265 could not track the pupil, and instances in which the pupil size was beyond three standard  
266 deviations (SD) from the median pupil size of the block were considered to be artifacts. During  
267 blinks and artifacts (including those detected by the EyeLink 1000 software), the data were  
268 linearly interpolated over these intervals and nearest neighbor interpolation was used at the  
269 start and end points of these intervals. Blinks, partial blinks, or other artifacts detected within  
270 0.25 s of one another were linearly interpolated as a single blink, and data were linearly  
271 interpolated from 0.15 s prior to and 0.15 s after each detected blink. Nearest neighbor  
272 interpolation was employed at the start and end of each blink/artifact. To interpolate over peak-  
273 detected blinks, the pupil size data were initially smoothed using a two-dimensional digital filter  
274 with an 11-point symmetric Hann window. Peak-detected blinks (separated in time by a  
275 minimum duration of 0.5 s) were subsequently interpolated: peak-detected blinks detected  
276 within 0.25 s of one another were interpolated as a single peak-detected blink, and data were  
277 interpolated from 0.3 s prior to and 0.15 s subsequent to each peak-detected blink. Nearest  
278 neighbor interpolation was also employed at the start and end of each peak-detected blink.  
279 Furthermore, to meet criteria for inclusion in the study, a participant's data were excluded if  
280 blinks or artifacts constituted more than two-thirds of the duration of an experimental condition  
281 (absence versus presence of distractors) across all blocks for that condition. (Only one

282 participant, a control, did not meet this criterion, and his data are not included in the summary  
283 statistics above nor in the analyses below.)

284 To assess each participant's baseline pupil size, at the start of each block, participants  
285 viewed a central fixation (the same green circle on a gray background used in the experiment)  
286 for approximately 45 s prior to starting the task. For each participant, the median of all pupil size  
287 measurements across these passive viewing periods was computed. One participant (in the  
288 ASD group) blinked and exhibited artifacts for more than two-thirds of the duration of baseline  
289 pupil size recordings. This participant's data were thus discarded from analyses of baseline  
290 pupil size only.

291 Parameters for preprocessing of the pupillometry data were decided upon prior to  
292 completion of data collection and final performance of statistical analyses, based on visual  
293 inspection of initial data collection. For analyses of task-evoked pupil responses, pupil size  
294 measurements were converted to percent signal change relative to the mean pupil size within  
295 the entire block in which they were collected. This was done to normalize between-block  
296 differences in pupil response amplitudes caused by interaction between the tonic and phasic  
297 components of the pupil signal (Eldar et al., 2013). To eliminate very low frequency fluctuations,  
298 the pupil size signal was high-pass filtered with a Butterworth filter of order 4 with a cutoff of  
299 0.03 Hz. To reduce the sampling rate of the signal for further analysis, a low-pass Chebyshev  
300 Type I filter was used with an order of 8, and the sampling rate of the data was subsequently  
301 reduced by a factor of 25.

302 Linear deconvolution was used to estimate how the pupil responded to task events.  
303 Deconvolution analysis is a form of regression often used in fMRI analyses where physiological  
304 responses to fast stimulus presentations from each trial can introduce noise into the signal for  
305 an event of interest (Glover, 1999; McCloy et al., 2016). To "deconvolve" an impulse response  
306 function (IRF) of the pupillary response to a given event, the pupil time series data is multiplied  
307 by the pseudoinverse of the design matrix with the events of interest (Gardner et al., 2008). For

308 each participant, the pupil's IRF was deconvolved to a letter repeat preceding a hit, a letter  
309 repeat preceding a miss, and the 1-s preceding a false alarm (FA), separately for each task  
310 condition (no distractor vs. distractor). A single deconvolution block matrix was used, composed  
311 of 3 concatenated design matrices, one per event type, to covary out the other predictors in  
312 each IRF's estimation. It was assumed that each IRF was 4 s in duration. The amplitude of the  
313 pupil response was calculated as the median absolute deviation (MAD) of the IRF. If a given  
314 pupil response amplitude value was greater than or less than 3 SD from the mean of the pupil  
315 amplitudes of all participants in a group (by diagnosis) for an event (hit, FA, or miss), that value  
316 was assumed to be artifactual, treated as an outlier, and discarded. Additionally, in a separate  
317 analysis, a deconvolution block matrix was used, with a single design matrix with the onset of  
318 distractor tones, to generate IRFs (also 4 s in duration) for pupillary responses to distractors.

319

### 320 *Inferential Analyses*

321 All inferential statistics were performed with R version 3.5.2 (R Foundations for  
322 Statistical Computing), using the dplyr (Wickham et al., 2019), psych (Revelle, 2019), lme4  
323 (Bates et al., 2019 p.4), lmerTest (Kuznetsova et al., 2019), and multcomp (Hothorn et al., 2019)  
324 packages. Analysis figures were generated using the seaborn Python package (Michael  
325 Waskom et al., 2018).

326 For analyses on sensitivity index ( $d'$ ), criterion (C), reaction time (RT), and pupil  
327 amplitude response (each to hits, FAs, and misses), linear mixed models were fitted to predict  
328 these variables, with group and task condition as fixed effect predictors and participant as a  
329 random effect predictor. For analyses on average baseline pupil size (for which there is only one  
330 derived measurement per participant), linear models were fitted to predict these variables, with  
331 group as a predictor. Because use of adrenergic-related medications was predictive of group,  
332 this variable was also included as a predictor in all of the aforementioned models. For each  
333 dependent measure, separate models were fitted, either including or excluding the use of

334 medications as a predictor, and the Bayesian information criterion (BIC) was calculated for each  
 335 to determine the optimal model. For models that included medication use as a predictor, the BIC  
 336 was higher than the model with this variable excluded (the model with the lowest BIC is  
 337 preferred; Wagenmakers, 2007; Table 4), in all cases. Thus, reported models only include group  
 338 and task condition (when applicable) as predictors of the respective dependent measure of  
 339 interest.

340 **Table 4.** BIC values for models with and without medication use as a predictor. Each cell  
 341 designates a different model: the row designates the dependent measurement and the column  
 342 designates the predictors included.

|                                | Group*Distractors | Group*Distractors<br>*Medications |
|--------------------------------|-------------------|-----------------------------------|
| d'                             | 221.43            | 236.25                            |
| C                              | 93.59             | 114.29                            |
| RT                             | -266.58           | -228.89                           |
| Baseline                       | 387.04            | 394.12                            |
| Pupil Size                     |                   |                                   |
| Amplitude to<br>Hits (Pupil)   | -821.93           | -764.82                           |
| Amplitude to<br>FAs Pupil      | -708.42           | -654.57                           |
| Amplitude to<br>Misses (Pupil) | -758.92           | -706.05                           |
| Amplitude to<br>Tone Onsets    | -512.06           | -505.14                           |

343  
 344 In addition, to verify the findings from the linear mixed models predicting pupil response  
 345 amplitude to hits, FAs, and misses, for each such task event, the ratio of the pupil response  
 346 amplitude in the presence of distractors to that in the absence of distractors was computed for

347 each participant. For each task event, a linear model was fitted with this ratio as the dependent  
348 measure and group as the predictor.

349 Absolute values of test statistics are reported. The  $\alpha$  criterion for statistical significance  
350 was designated as 0.05 for all inferential statistical analyses. In cases in which there was no  
351 statistical significance, an approximation for the Bayes Factor (BF) was computed using the  
352 respective BICs of the null model (excluding all fixed effect predictors) and alternative model  
353 (including all fixed effect predictors). A BF between 3 and 20, between 20 and 150, or greater  
354 than 150 was designated as positive, strong, or very strong evidence for the null hypothesis,  
355 respectively (Wagenmakers, 2007). All participants whose data were not determined to be  
356 outliers as described above were included ( $n = 23$  and  $24$  in the ASD and control groups,  
357 respectively). Some participants do not have select data values (such as a participant who does  
358 not commit any FAs, and therefore has no pupil amplitude response to FAs); degrees of  
359 freedom (df), however, are reported for all inferential analyses.

360

### 361 *Classification Analyses*

362 To validate the inferential statistical analyses, classification analyses were used to  
363 assess whether group membership could be predicted from pupil response amplitude. A logistic  
364 regression model was fitted with group as the dependent measure and the absolute difference  
365 of the pupil response amplitude between the two conditions (absence versus presence of  
366 distractors) as the predictor, for each event type (hit, FA, or miss). The LogisticRegression class  
367 within the scikit-learn version 19.1 (Pedregosa et al., 2011) package in Python version 3.7.1  
368 (Python Software Foundation) was used with the saga solver and no regularization. Twenty  
369 repeats of five-fold cross-validations were performed to compute the predictive accuracy of  
370 group for each event and condition combination. A null distribution was created by shuffling the  
371 labels 10,000 times and performing the same cross-validation classification approach. The  
372 statistical significance ( $p$ -value) of the classification accuracy was determined by a comparison

373 to the null distribution, as (1-percentile), where percentile indexes the percentile of the true  
374 classification accuracy in the distribution of null distribution classification accuracies.

375 As three independent classification analyses were performed (3 event types), for these  
376 analyses, an accuracy value was considered significant if the  $p$ -value was lower than the  
377 Bonferroni-corrected criterion:  $0.05/3 = 0.02$ .

378

### 379 Code Accessibility

380 Experiment and preprocessing MATLAB scripts, R and Python analysis code, and  
381 preprocessed data are available on GitHub: [https://github.com/michaelgrano/ASD\\_nback](https://github.com/michaelgrano/ASD_nback).

382

### 383 **Results**

384 First, group differences in behavioral performance were analyzed to determine whether  
385 both groups performed comparably on the task. Second, group differences in time-averaged  
386 pupil size were analyzed to rule out the possibility of any systematic a priori differences in pupil  
387 size between the groups. Last, between-group comparisons of the pupil response amplitude to  
388 each task event (hits, FAs, and misses) for each task condition (absence versus presence of  
389 distractors) were analyzed. Group differences in pupil amplitude to distractor tone onsets were  
390 also assessed. Pupil amplitude in response to stimuli that elicit hits and FAs, but not to stimuli  
391 that elicit misses or to distractor stimuli themselves, are “task-evoked” and should be associated  
392 with LC activity because only pupillary responses to cognitive decisions can be inferred to be  
393 caused by fluctuations in LC activity (Aston-Jones and Cohen, 2005). Finally, classification  
394 analyses were used to determine whether a diagnosis of ASD could be predicted from task-  
395 evoked pupil responses alone.

396

397

398



399 *Comparable between-group task performance in the absence and presence of distractor stimuli.*

400 Group differences in behavioral performance were initially analyzed as any such  
401 differences could confound observed group differences in pupillary responses. The  $d'$ ,  $C$ , and  
402 RT were computed for each participant, for each task condition (absence versus presence of  
403 distractors). (If a participant's  $d'$  or  $C$  was positive or negative infinity, the maximum or minimum  
404 value for that participant's group in the given condition was substituted for these analyses,  
405 respectively.) Figure 2 shows the  $d'$ ,  $C$ , and RT for the two groups. There was no significant  
406 effect of group ( $t(56.29) = 1.57, p = 0.12$ ), task condition ( $t(45.00) = 0.66, p = 0.52$ ), or their  
407 interaction ( $t(45.00) = 0.16, p = 0.88$ ) on  $d'$  (Figure 2a). Likewise, there was no significant effect  
408 of group ( $t(66.31) = 1.02, p = 0.31$ ), task condition ( $t(45.00) = 1.86, p = 0.07$ ), or their interaction  
409 ( $t(45.00) = 0.49, p = 0.62$ ) on  $C$  (Figure 2b). There was very strong evidence that neither group  
410 nor presence of distractor stimuli predicts  $d'$  ( $BF = 3262.08$ ) or  $C$  ( $BF = 8760.19$ ).

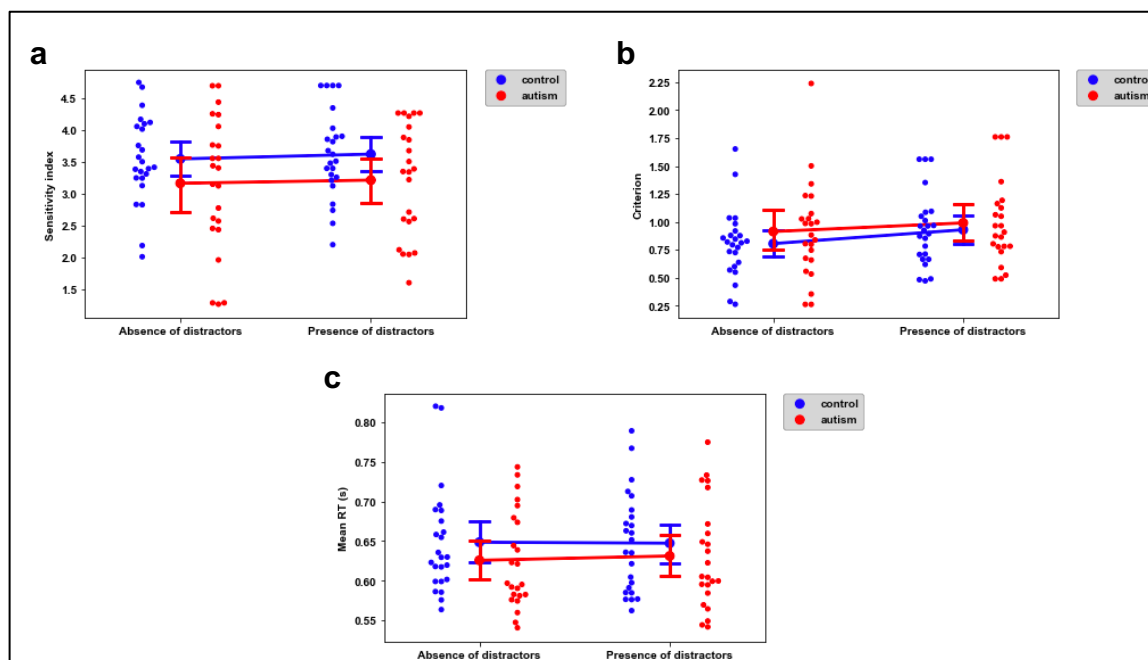

411 **Figure 2.** Behavioral performance on the letter detection task. **a**,  $d'$ , **b**,  $C$ , and **c**, RT, across  
412 group (autism versus control) and condition (absence versus presence of distractor stimuli).  
413 Each point represents an individual participant. Line plots show mean  $\pm$  one standard error of  
414 the mean (SEM).  
415

416  
417 The mean RT (time between the onset of a letter repeat and a correct button press)  
418 across all correct responses was also computed for each participant, separately for each task

419 condition. There was no significant effect of group ( $t(50.47) = 1.21, p = 0.23$ ) or task condition  
420 ( $t(45.00) = 0.19, p = 0.85$ ) on mean RT. There was also no significant interaction of group x task  
421 condition on mean RT ( $t(45.00) = 0.73, p = 0.47$ ), and there was very strong evidence in favor of  
422 the null hypothesis ( $BF = 30545766.18$ ; Figure 2c).

423 The lack of a main effect of group on  $d'$ ,  $C$ , or RT indicates similarity in task performance  
424 between the two groups. Given that there are no differences in performance, any differences in  
425 pupil size are unlikely to be attributed to differences in behavioral performance and, indeed, a  
426 simple task was selected specifically to equate performance as much as possible. The  
427 interaction between group x condition also rules out a foundational difference in working  
428 memory, a required component of the task, in the ASD versus control participants.

429

430 *No between-group differences in baseline pupil size.*

431 Group differences in time-averaged pupil size were analyzed to rule out the possibility of  
432 any systematic a priori differences in pupil size between the groups. Baseline pupil size  
433 (recorded prior to each task block) was compared between groups to determine whether pupil  
434 size differed between participants with ASD and controls, independent of the letter detection  
435 task. As shown in Figure 3, there was no significant effect of group on the median baseline pupil  
436 size ( $t(44) = 0.09, p = 0.93$ ), with positive evidence that group does not predict this measure ( $BF$   
437  $= 6.75$ ). The lack of a main effect of group indicates that there were no systematic differences in  
438 pupil size, thereby ruling out confounding variables that would be independent of the task.

439

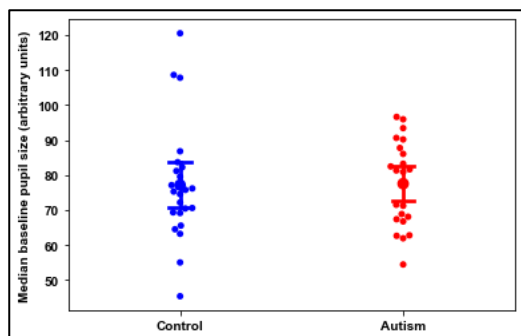

440  
441 **Figure 3.** Median baseline pupil size of participants, by group. Each point represents an  
442 individual participant. Line plots show mean  $\pm$  one SEM.  
443

444 *Individuals with ASD exhibited smaller task-evoked pupil response amplitudes than did controls*  
445 *in the presence but not absence of distractor stimuli.*

446 Linear deconvolution analysis (Glover, 1999; McCloy et al., 2016) was used to  
447 approximate a 4-s IRF to each task event (hits, FAs, and misses) for each participant in each  
448 task condition. The individual IRFs of participants' pupillary responses to hits are shown in  
449 Figure 4. The pupil response amplitude was calculated as the MAD of the IRF, as this value  
450 captures the dispersion of the pupillary response, while reducing the impact of noise caused by  
451 limited data (Kret and Sjak-Shie, 2019). This is similar to the approach extensively adopted in  
452 the fMRI literature, where the dispersion of the blood oxygen level dependent signal time course  
453 has been used as a non-parametric measure of response amplitude (Power et al., 2018).

454 Between-group comparisons of the pupil amplitude response to each task event  
455 associated with a decision (hits and FAs) for each task condition (absence versus presence of  
456 distractors) were analyzed. These pupillary responses should reflect changes in LC activity  
457 because pupil dilations occur specifically in response to the appearance of a stimulus on a  
458 cognitive task (here, the one-back letter detection task) that results in a decision (here, a key  
459 press; Aston-Jones and Cohen, 2005).

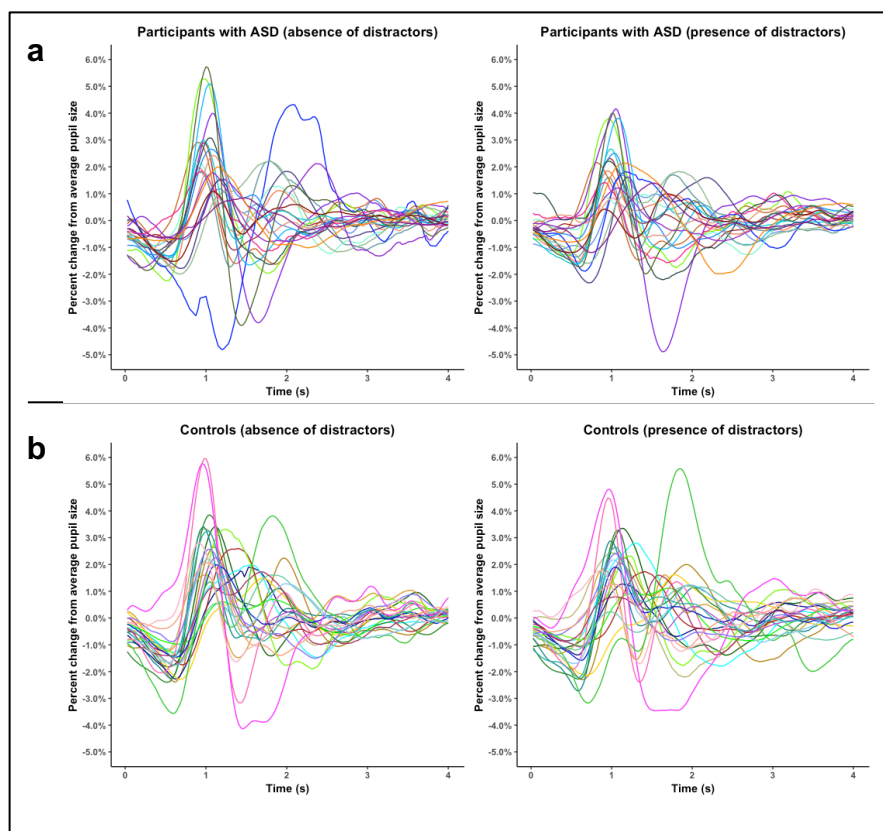

460

461 **Figure 4.** All participants' individual IRFs of pupillary responses to hits. Each color represents  
462 the IRF of a unique participant in the **a**, ASD and **b**, control groups, with the left panel showing  
463 the results in absence of distractors and the right panel showing the results in the presence of  
464 distractors.

465

466

467 As evident from Figure 5, there was a significant interaction between group and the  
468 presence/absence of distractor stimuli on pupil amplitude in response to both hits ( $t(43.63) =$   
469  $3.06, p < 0.01$ ) and FAs ( $t(42.44) = 2.65, p = 0.01$ ). Furthermore, in the presence versus  
470 absence of distractor stimuli, there was a significant increase in pupil amplitude in response to  
471 hits ( $t(43.28) = 2.93, p < 0.01$ ), independent of group, but no significant difference in response to  
472 FAs ( $t(42.78) = 1.13, p = 0.26$ ). Moreover, there was no significant effect of group on pupil  
473 amplitude in response to either hits ( $t(67.36) = 0.08, p = 0.94$ ) or FAs ( $t(70.46) = 0.17, p = 0.87$ ).

473

474 Post-hoc contrast tests of the effect of task condition on pupil response amplitude  
475 performed separately for each group showed that, as anticipated (Gilzenrat et al., 2010), among  
476 controls, the pupil amplitude in response to hits was significantly higher in the presence versus  
477 absence of distractors ( $z = 2.93, p < 0.01$ ). Notably, there was no such significant difference in

477 response to hits among participants with ASD ( $z = 1.43, p = 0.15$ ). Moreover, while there was no  
478 significant between-group difference in pupil amplitude in response to hits in the absence of  
479 distractors ( $z = 0.08, p = 0.94$ ), in the presence of distractors, individuals with ASD exhibited  
480 lower pupil response amplitudes than did the controls ( $z = 2.80, p < 0.01$ ). In fact, the ratio of the  
481 pupil response amplitude in the presence of distractors to that in the absence of distractors was  
482 significantly higher among controls than it was among participants with ASD ( $t(45.00) = 3.10, p$   
483  $< 0.01$ ; Figure 5a).

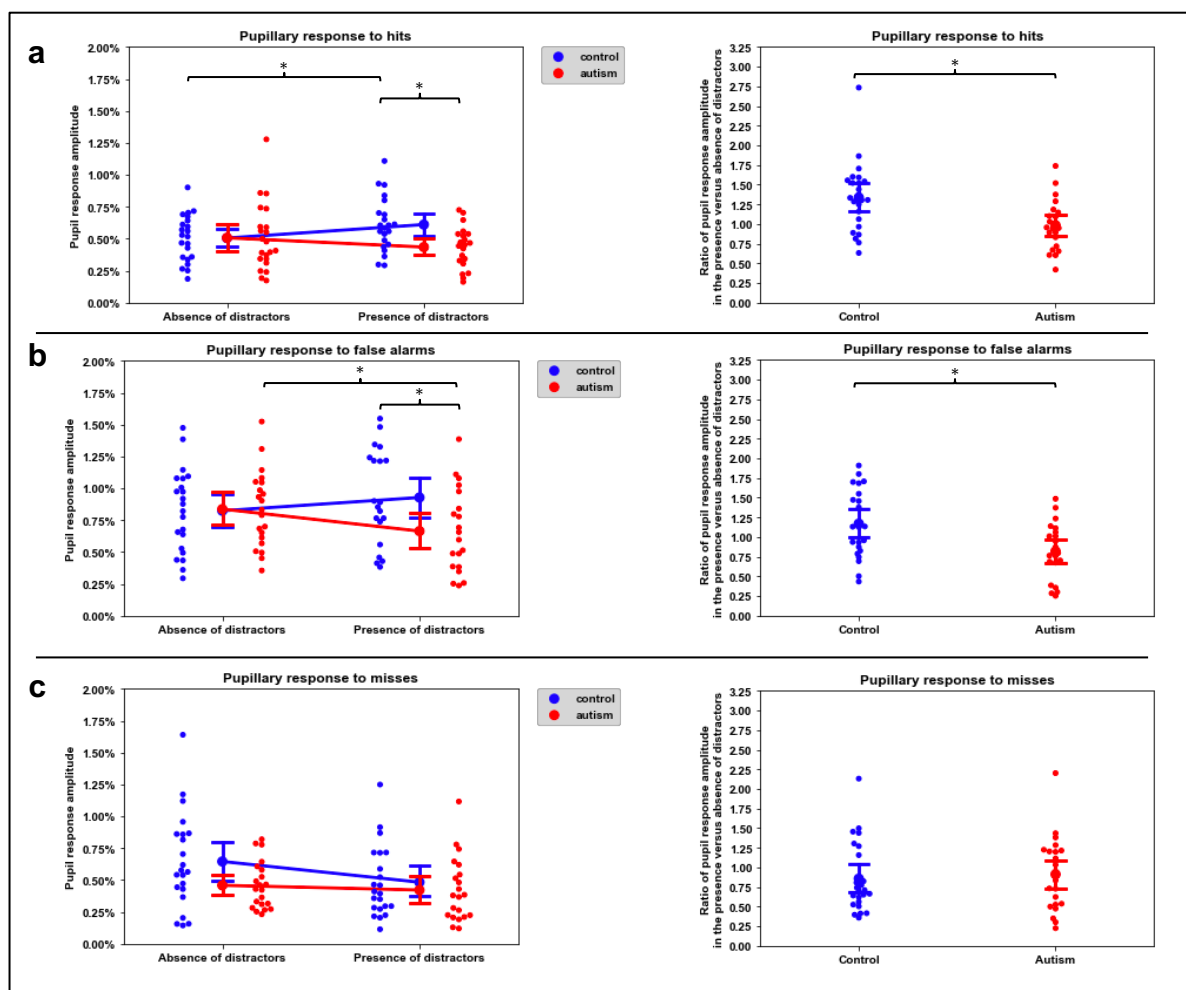

484  
485 **Figure 5.** Pupil response amplitudes to **a**, hits **b**, false alarms, and **c**, misses, compared across  
486 groups and task conditions. Left-hand panels show pupil response amplitude, as defined as the  
487 MAD of the IRF of the respective pupil response, after normalization of the pupil time series  
488 data to the mean pupil size of the respective experiment block. Right-hand panels show the  
489 ratio of the pupil response amplitude in the presence of distractors to that in the absence of  
490 distractors. Line plots show mean  $\pm$  one SEM. \* and \*\* signify  $p < 0.05$  and  $0.01$ , respectively for  
491 contrast tests.  
492

493 Furthermore, among individuals with ASD, the pupil amplitude in response to FAs was  
494 significantly lower in the presence versus absence of distractors ( $z = 2.61, p < 0.01$ ), while this  
495 was not the case among controls ( $z = 1.13, p = 0.26$ ). As was the case with hits, the pupil  
496 amplitudes in response to FAs were not different between groups in the absence of distractors  
497 ( $z = 0.17, p = 0.87$ ), but, in the presence of distractors, individuals with ASD exhibited lower  
498 pupil response amplitudes than controls ( $z = 2.57, p = 0.01$ ). Additionally, the ratio of the pupil  
499 response amplitude in the presence of distractors to that in the absence of distractors was  
500 significantly higher among controls than it was among participants with ASD ( $t(42.00) = 2.85, p$   
501  $= 0.01$ ; Figure 5b).

502 Thus, overall, pupillary responses to stimuli that elicit behavioral reports (thereby  
503 suggestive of LC activity; Aston-Jones and Cohen, 2005) in the distractor-present condition (i.e.  
504 with increased cognitive load and task engagement) were lower among individuals with ASD.  
505 However, in the absence of distractor stimuli, no between-group differences existed.

506  
507 *No interaction effect between group and task condition on pupil amplitude responses to misses.*

508 If the interaction effect between group and task condition on pupil response amplitude  
509 was specific to cognitive effort on the task (which would implicate LC activity (Aston-Jones and  
510 Cohen, 2005), then we would not expect to see an interaction of group and task condition on  
511 pupil amplitude in response to misses (that is, on trials where effort was likely to be least).  
512 Indeed, there was no significant interaction between group and task condition on pupil  
513 amplitude in response to misses ( $t(44.00) = 1.41, p = 0.17$ ). Additionally, the ratio of the pupil  
514 response amplitude in the presence of distractors to that in their absence was not significantly  
515 different between the two groups ( $t(45.00) = 0.41, p = 0.68$ ;  $BF = 6.21$ , positive evidence for the  
516 null hypothesis). However, there were main effects of group and of task condition. Individuals  
517 with ASD exhibited lower pupil amplitudes in response to misses, independent of task condition,  
518 relative to controls ( $t(70.72) = 2.28, p = 0.03$ ), and participants in both groups exhibited lower

519 pupil amplitudes in response to misses in the presence versus absence of distractors ( $t(44.00) =$   
520  $2.92, p < 0.01$ ; Figure 5c). It is conceivable that controls might notice misses across both task  
521 conditions more so than individuals with ASD, which might explain why controls' pupil  
522 amplitudes in response to misses are overall higher.

523 In summary, in response to an event that is likely to be only weakly implicated with LC  
524 activity because of the lack of cognitive effort to a miss (Aston-Jones and Cohen, 2005),  
525 individuals with ASD do exhibit lower pupil response amplitudes, but importantly, independent of  
526 the attentional demands of the task.

527  
528 *Group membership can be predicted from the difference in pupil amplitude responses in the*  
529 *presence versus absence of distractors, only during hits and FAs (and not misses).*

530 To validate the differential response to hits and FAs for the two groups and the effect of  
531 distractor condition, an assumption-free classification algorithm was used to determine whether  
532 group could be predicted from the task-evoked pupil response amplitudes alone. For each event  
533 type (hits, FAs, and misses), a logistic regression model was fitted to assess whether group  
534 classification (autism or control) could be predicted from the difference in the pupil response  
535 amplitude between the two conditions (absence versus presence of distractors). Consistent with  
536 the findings demonstrating an interaction between group and task condition on pupil response  
537 amplitudes to hits and FAs, group could be decoded from the between-conditions difference in  
538 pupil amplitude in response to hits (accuracy = 0.63,  $p < 0.01$ ) and FAs (accuracy = 0.56,  $p <$   
539  $0.01$ ) with above-chance accuracy. At the same time, the between-conditions difference in pupil  
540 amplitude in response to misses was not predictive of group and was below-chance in accuracy  
541 (accuracy = 0.38,  $p = 1.00$ ).

542

543

544

545 *No between-group differences of pupil dilations to the task-irrelevant distractor stimuli.*

546       Group differences in pupil response amplitude just to distractor tone onsets were also  
547 assessed. While pupil dilations can occur in response to auditory stimuli (Zekveld et al., 2018),  
548 LC activity is not associated with pupil dilations to task-irrelevant stimuli (Aston-Jones et al.,  
549 1999; Aston-Jones and Cohen, 2005; Gilzenrat et al., 2010) such as the onset of orthogonal  
550 distractors. If differences in pupillary dynamics between the two groups is specific to inherent  
551 group differences in LC activity, differences in pupil dilations to task distractor stimuli would not  
552 be expected. To test this, pupil amplitude responses to the onset of distractor stimulus  
553 presentation were compared between the two groups. There was no significant effect of group  
554 on pupil response amplitude to the onset of distractors ( $t(44) = 1.66, p = 0.10$ ), suggesting that  
555 group does not predict pupillary response to distractors per se (BF = 1.68; Figure 6). Thus,  
556 group differences in pupillary dynamics are likely to be independent of pupil responses to the  
557 distractor stimulus presentations themselves.

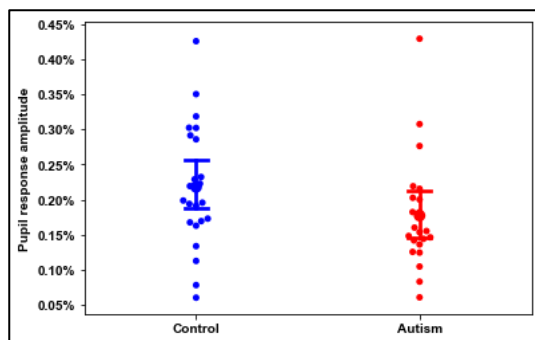

558 **Figure 6.** Pupil response amplitude to distractor stimuli, after normalization of the pupil time  
559 series data to the mean pupil size of the respective experiment block. Line plots show mean  $\pm$   
560 one SEM.  
561  
562

## 563 **Discussion**

564       The goal of this study was to explore differences in LC activity (inferred from  
565 pupillometry measurements) between individuals with ASD and matched controls as they  
566 performed a simple visual working memory task in the absence or presence of distractor  
567 auditory tones. The ASD and control groups performed the task with statistically



568 indistinguishable accuracy and speed, both in the presence and absence of distractors.  
569 However, specifically in the presence of distractors, individuals with ASD exhibited lower task-  
570 evoked pupil response amplitudes than did controls. Furthermore, group could be decoded with  
571 above-chance accuracy based solely on the difference of task-evoked pupil response  
572 amplitudes in the presence versus absence of distractors. This physiological effect could not be  
573 accounted for due to between-group differences in medication use or baseline pupil size and  
574 was specific to task-evoked responses. As LC activity can be inferred from pupillary responses  
575 to task-relevant information, the lower task-evoked pupil response amplitudes in the ASD  
576 compared to control participants in the presence of distractors implicates dysregulation of LC  
577 activity.

578 Pupil dilation—specifically in association with a task decision—is an established direct  
579 correlate of phasic LC activity and an established inverse correlate of tonic LC activity. A rise in  
580 tonic LC activity increases the gain of neural activity indiscriminately throughout cortex, thereby  
581 increasing neural responsivity. It has been posited that this indiscriminate increase in cortical  
582 gain allows for increased behavioral flexibility, exploration of the task environment, and thus  
583 attention to both task-relevant and task-irrelevant stimuli. In contrast, when tonic LC activity and  
584 global gain are reduced, attentional deployment shifts to task-relevant stimuli, and attention to  
585 task-irrelevant distractors becomes attenuated (Aston-Jones et al., 1999; Aston-Jones and  
586 Cohen, 2005; Gilzenrat et al., 2010; Pfeffer et al., 2017). It is thus particularly notable that in the  
587 present study participants with ASD evinced lower pupil response amplitudes in the *presence* of  
588 distractors because one would expect a typically developing individual to demonstrate increased  
589 pupil response amplitude (indicating higher LC activity) under increased attentional demands  
590 (Aston-Jones and Cohen, 2005; Gilzenrat et al., 2010).

591 A recent review from Bast et al. (2018) suggests LC dysfunction might be associated  
592 with attentional differences in ASD, but there has been little prior empirical evidence to support  
593 this hypothesis. Several studies have shown differences in phasic pupillary responses in ASD

594 (Martineau et al., 2011; Blaser et al., 2014; Nuske et al., 2014a, 2014b; Krach et al., 2015;  
595 Lawson et al., 2017), some even suggesting, in contrast to the results here, that individuals with  
596 ASD exhibit larger phasic pupillary responses compared to typically developing controls (Blaser  
597 et al., 2014; Lawson et al., 2017; Bast et al., 2019). However, in these studies participants with  
598 ASD exhibited differences in task performance compared to controls, and thus differences in  
599 pupil dilations may be attributable to differences in task performance. Importantly, in the current  
600 study, participants with ASD and controls showed comparable performance on the task, in  
601 terms of both signal detection theoretic and RT measures. A one-back task was specifically  
602 utilized because: 1) it was expected to elicit phasic pupillary responses associated with task  
603 decisions, and 2) it was expected that participants with ASD would perform comparably to  
604 controls (Williams et al., 2005). Had participants with ASD performed more poorly than controls,  
605 the observed interaction of group and task condition on pupil response amplitudes might have  
606 been a consequence of task performance rather than of LC activity per se. However, as task  
607 performance did not differ between the two groups, the between-group differences in task-  
608 evoked pupil response amplitudes across conditions suggest an inherent difference in LC  
609 physiology among the participants with ASD.

610         A number of processes could account for differences in pupillary dynamics in individuals  
611 with ASD, and it has been suggested that individuals with ASD exhibit heightened autonomic  
612 activity (Cheshire, 2012; Kushki et al., 2013) potentially in relation to comorbid anxiety  
613 diagnoses (Lord et al., 2018). Furthermore, prior literature has suggested that individuals with  
614 ASD exhibit larger tonic pupil sizes (Anderson and Colombo, 2009; Anderson et al., 2013;  
615 Blaser et al., 2014). However, unlike prior findings that might be attributed to generalized  
616 autonomic arousal, the results of the present study indicate that differences in pupillary  
617 dynamics in the participants with ASD are specifically task-dependent, and, therefore, provide  
618 clear inference of LC activity per se. First, group differences were noted, even after controlling  
619 for the potential contribution of caffeine or adrenergic-related medications and even though

620 time-averaged pupil size recorded prior to each task block was equivalent between groups.  
621 Second, an interaction of task condition and group on pupil response amplitudes was only  
622 revealed for phasic pupillary responses in association with hits and FAs, but not in association  
623 with misses. Third, there were no group differences in phasic pupil amplitudes in response to  
624 distractor stimulus onset, which alone would not be expected to specifically elicit LC activity  
625 (Aston-Jones and Cohen, 2005). These are critical observations because LC activity has been  
626 correlated primarily with task-related decisions (Aston-Jones et al., 1999; Aston-Jones and  
627 Cohen, 2005; Gilzenrat et al., 2010). Thus, the effects in pupillary dynamics uncovered in this  
628 investigation are most likely to be associated with group differences in LC activity.

629 Elevated tonic LC activity can globally increase neural gain, amplifying neural activity  
630 and enhancing overall neural responsiveness (Aston-Jones and Cohen, 2005). Generally,  
631 enhanced neural gain is advantageous as it allows for exploratory behaviors and learning from  
632 new features of one's environment. Studies in typically developing individuals suggest that,  
633 when in a tonic LC mode, individuals are more likely to attend selectively to salient stimulus  
634 cues (Eldar et al., 2016) or focus their attention on stimulus features to which they are  
635 individually predisposed to attend to (Eldar et al., 2013). However, an inability to regulate neural  
636 gain could limit the ability to distinguish relevant versus irrelevant stimuli (Gilzenrat et al., 2010),  
637 thereby hampering the establishment of priors and the ability to learn from novel environmental  
638 input (Sinha et al., 2014; Dinstein et al., 2015). Thus, if individuals with ASD exhibit consistently  
639 elevated gain, this could enhance attention to particular environmental stimuli, but would impair  
640 the ability to properly establish priors (Sinha et al., 2014). Attention might thus be deployed  
641 indiscriminately to task-relevant and task-irrelevant stimuli. This indiscriminate but selective  
642 attention from elevated gain could explain the fixated interests, selective attention, and  
643 hypersensitivity to environmental stimuli in individuals with ASD (Remington et al., 2009; Lord et  
644 al., 2018), as consistently high LC tonic activity would ultimately preclude the diversion of  
645 attention from distractor or task-irrelevant features in one's environment (Gilzenrat et al., 2010).

646 If an individual with ASD cannot readily increase gain in the presence of distractors, this would  
647 significantly hamper typical learning processes. Social communication atypicalities in individuals  
648 with ASD might also be explained by consistently elevated gain: an inability to learn from social  
649 cues and expressions (Lord et al., 2018) might be a reflection of a broader inability to learn from  
650 environmental stimuli (Sinha et al., 2014).

651 If individuals with ASD exhibit higher tonic LC activity than controls in an environment  
652 with both task- relevant and irrelevant stimuli, such a dysregulation of the LC system would be  
653 consistent with the proposal of disrupted E-I homeostasis of cortical activity in ASD (Sur and  
654 Rubenstein, 2005; Rosenberg et al., 2015). Much research on E-I homeostasis has focused on  
655 the roles of glutamate and GABA in achieving this balance (Hensch, 2005; Samardzic et al.,  
656 2018), which is critical for efficient perceptual processing (Zhou and Yu, 2018). In fact, there  
657 have been several demonstrations of atypical GABA activity in ASD (Pizzarelli and Cherubini,  
658 2011; Robertson et al., 2016; Uzunova et al., 2016; Ajram et al., 2017). But perhaps the  
659 disruption in E-I homeostasis is not only or strictly a disruption in the *ratio* of excitatory to  
660 inhibitory activity, but in the *gain*, which is a measure of the simultaneous amplification (or  
661 dampening) of excitatory and inhibitory activity (Servan-Schreiber et al., 1990; Aston-Jones and  
662 Cohen, 2005; Hoshino, 2005; Pfeffer et al., 2017). Unregulated neural responsivity due to  
663 elevated LC activity would, in fact, be consistent with findings that uncover highly variable neural  
664 responses to sensory stimuli in ASD (Dinstein et al., 2012; Haigh et al., 2015). In other words,  
665 with dysregulated gain in ASD from elevated LC activity, neural output would be highly  
666 unpredictable from neural input.

667 Consistently elevated tonic LC activity—and consequently globally increased cortical  
668 gain—in an attention-demanding environment is thus consistent with clinical and behavioral  
669 characteristics of ASD, as well as the E-I homeostasis disruption hypothesis. This study  
670 provides physiological evidence for an inherent difference in regulation of tonic LC activity on a  
671 task on which individuals with ASD perform comparably to controls, laying the foundation for

672 future work to explore the direct effects of this dysregulation on more challenging tasks that  
673 reflect the burdensome cognitive load of one's real-world environment. These results provide  
674 novel evidence for the LC's role in gain dysregulation, and consequent atypical attention, in  
675 ASD and, in addition, offer a possible neurobiological basis for some signatures of ASD such as  
676 social communication and restricted learning.

677

## 678 **References**

679 Abokyi S, Owusu-Mensah J, Osei KA (2017) Caffeine intake is associated with pupil dilation and  
680 enhanced accommodation. *Eye* 31:615–619.

681 Ajram LA, Horder J, Mendez MA, Galanopoulos A, Brennan LP, Wichers RH, Robertson DM,  
682 Murphy CM, Zinkstok J, Ivin G, Heasman M, Meek D, Tricklebank MD, Barker GJ,  
683 Lythgoe DJ, Edden RAE, Williams SC, Murphy DGM, McAlonan GM (2017) Shifting  
684 brain inhibitory balance and connectivity of the prefrontal cortex of adults with autism  
685 spectrum disorder. *Transl Psychiatry* 7:e1137.

686 Allen G, Courchesne E (2001) Attention function and dysfunction in autism. *Front Biosci J*  
687 *Virtual Libr* 6:NaN-NaN.

688 Anderson CJ, Colombo J (2009) Larger tonic pupil size in young children with autism spectrum  
689 disorder. *Dev Psychobiol* 51:207–211.

690 Anderson CJ, Colombo J, Unruh KE (2013) Pupil and salivary indicators of autonomic  
691 dysfunction in autism spectrum disorder. *Dev Psychobiol* 55:465–482.

692 Aston-Jones G, Cohen JD (2005) AN INTEGRATIVE THEORY OF LOCUS COERULEUS-  
693 NOREPINEPHRINE FUNCTION: Adaptive Gain and Optimal Performance. *Annu Rev*  
694 *Neurosci* 28:403–450.

695 Aston-Jones G, Rajkowski J, Cohen J (1999) Role of locus coeruleus in attention and  
696 behavioral flexibility. *Biol Psychiatry* 46:1309–1320.

697 Aston-Jones G, Rajkowski J, Kubiak P, Alexinsky T (1994) Locus coeruleus neurons in monkey  
698 are selectively activated by attended cues in a vigilance task. *J Neurosci Off J Soc*  
699 *Neurosci* 14:4467–4480.

700 Bast N, Banaschewski T, Dziobek I, Brandeis D, Poustka L, Freitag CM (2019) Pupil Dilation  
701 Progression Modulates Aberrant Social Cognition in Autism Spectrum Disorder. *Autism*  
702 *Res* 0 Available at: <https://onlinelibrary.wiley.com/doi/full/10.1002/aur.2178> [Accessed  
703 November 5, 2019].

704 Bates D, Maechler M, Bolker B, Walker S, Christensen RHB, Singmann H, Dai B, Scheipl F,  
705 Grothendieck G, Green P, Fox J (2019) lme4: Linear Mixed-Effects Models using “Eigen”

- 706 and S4. Available at: <https://CRAN.R-project.org/package=lme4> [Accessed May 25,  
707 2019].
- 708 Blaser E, Eglington L, Carter AS, Kaldy Z (2014) Pupillometry Reveals a Mechanism for the  
709 Autism Spectrum Disorder (ASD) Advantage in Visual Tasks. *Sci Rep* 4:4301.
- 710 Brainard DH (1997) The Psychophysics Toolbox. *Spat Vis* 10:433–436.
- 711 Caplan B, Mendoza JE (2011) Edinburgh Handedness Inventory. In: *Encyclopedia of Clinical*  
712 *Neuropsychology* (Kreutzer JS, DeLuca J, Caplan B, eds), pp 928–928. New York, NY:  
713 Springer New York. Available at: [https://doi.org/10.1007/978-0-387-79948-3\\_684](https://doi.org/10.1007/978-0-387-79948-3_684)  
714 [Accessed May 18, 2019].
- 715 Cheshire WP (2012) Highlights in clinical autonomic neuroscience: New insights into autonomic  
716 dysfunction in autism. *Auton Neurosci* 171:4–7.
- 717 Dinstein I, Heeger DJ, Behrmann M (2015) Neural variability: friend or foe? *Trends Cogn Sci*  
718 19:322–328.
- 719 Dinstein I, Heeger DJ, Lorenzi L, Minshew NJ, Malach R, Behrmann M (2012) Unreliable  
720 Evoked Responses in Autism. *Neuron* 75:981–991.
- 721 Eldar E, Cohen JD, Niv Y (2013) The effects of neural gain on attention and learning. *Nat*  
722 *Neurosci* 16:1146–1153.
- 723 Eldar E, Niv Y, Cohen JD (2016) Do You See the Forest or the Tree? Neural Gain and Breadth  
724 Versus Focus in Perceptual Processing. *Psychol Sci* 27:1632–1643.
- 725 Gardner JL, Merriam EP, Movshon JA, Heeger DJ (2008) Maps of Visual Space in Human  
726 Occipital Cortex Are Retinotopic, Not Spatiotopic. *J Neurosci* 28:3988–3999.
- 727 Gilzenrat MS, Nieuwenhuis S, Jepma M, Cohen JD (2010) Pupil diameter tracks changes in  
728 control state predicted by the adaptive gain theory of locus coeruleus function. *Cogn*  
729 *Affect Behav Neurosci* 10:252–269.
- 730 Glover GH (1999) Deconvolution of Impulse Response in Event-Related BOLD fMRI1.  
731 *NeuroImage* 9:416–429.
- 732 Haigh SM, Heeger DJ, Dinstein I, Minshew N, Behrmann M (2015) Cortical variability in the  
733 sensory-evoked response in autism. *J Autism Dev Disord* 45:1176–1190.
- 734 Hensch TK (2005) Critical period plasticity in local cortical circuits. *Nat Rev Neurosci* 6:877–888.
- 735 Hoshino O (2005) Cortical Modulation of Synaptic Efficacies through Norepinephrine. In:  
736 *Adaptive and Natural Computing Algorithms* (Ribeiro B, Albrecht RF, Dobnikar A,  
737 Pearson DW, Steele NC, eds), pp 70–73. Vienna: Springer.
- 738 Hothorn T, Bretz F, Westfall P, Heiberger RM, Schuetzenmeister A, Scheibe S (2019)  
739 multcomp: Simultaneous Inference in General Parametric Models. Available at:  
740 <https://CRAN.R-project.org/package=multcomp> [Accessed May 25, 2019].



- 741 Joshi S, Li Y, Kalwani RM, Gold JI (2016) Relationships between Pupil Diameter and Neuronal  
742 Activity in the Locus Coeruleus, Colliculi, and Cingulate Cortex. *Neuron* 89:221–234.
- 743 Krach S, Kamp-Becker I, Einhäuser W, Sommer J, Frässle S, Jansen A, Rademacher L, Müller-  
744 Pinzler L, Gazzola V, Paulus FM (2015) Evidence from pupillometry and fMRI indicates  
745 reduced neural response during vicarious social pain but not physical pain in autism.  
746 *Hum Brain Mapp* 36:4730–4744.
- 747 Kret ME, Sjak-Shie EE (2019) Preprocessing pupil size data: Guidelines and code. *Behav Res*  
748 *Methods* 51:1336–1342.
- 749 Kushki A, Drumm E, Mobarak MP, Tanel N, Dupuis A, Chau T, Anagnostou E (2013)  
750 Investigating the Autonomic Nervous System Response to Anxiety in Children with  
751 Autism Spectrum Disorders. *PLOS ONE* 8:e59730.
- 752 Kuznetsova A, Brockhoff PB, Christensen RHB (2019) lmerTest: Tests in Linear Mixed Effects  
753 Models. Available at: <https://CRAN.R-project.org/package=lmerTest> [Accessed May 25,  
754 2019].
- 755 Lawson RP, Mathys C, Rees G (2017) Adults with autism overestimate the volatility of the  
756 sensory environment. *Nat Neurosci* 20:1293–1299.
- 757 Lord C, Elsabbagh M, Baird G, Veenstra-Vanderweele J (2018) Autism spectrum disorder. *The*  
758 *Lancet* 392:508–520.
- 759 Martineau J, Hernandez N, Hiebel L, Roché L, Metzger A, Bonnet-Brihault F (2011) Can pupil  
760 size and pupil responses during visual scanning contribute to the diagnosis of autism  
761 spectrum disorder in children? *J Psychiatr Res* 45:1077–1082.
- 762 McCloy DR, Larson ED, Lau B, Lee AKC (2016) Temporal alignment of pupillary response with  
763 stimulus events via deconvolution. *J Acoust Soc Am* 139:EL57–EL62.
- 764 McGuire RG (1992) Reporting of Objective Color Measurements. *HortScience* 27:1254–1255.
- 765 Michael Waskom et al. (2018) mwaskom/seaborn: v0.9.0 (July 2018). Zenodo. Available at:  
766 <https://zenodo.org/record/1313201#.XXbuLJNKjGI> [Accessed September 9, 2019].
- 767 Nuske HJ, Vivanti G, Dissanayake C (2014a) Reactivity to fearful expressions of familiar and  
768 unfamiliar people in children with autism: an eye-tracking pupillometry study. *J Neurodev*  
769 *Disord* 6:14.
- 770 Nuske HJ, Vivanti G, Hudry K, Dissanayake C (2014b) Pupillometry reveals reduced  
771 unconscious emotional reactivity in autism. *Biol Psychol* 101:24–35.
- 772 Oldfield RC (1971) The assessment and analysis of handedness: The Edinburgh inventory.  
773 *Neuropsychologia* 9:97–113.
- 774 Pedregosa F, Varoquaux G, Gramfort A, Michel V, Thirion B, Grisel O, Blondel M, Prettenhofer  
775 P, Weiss R, Dubourg V, Vanderplas J, Passos A, Cournapeau D, Brucher M, Perrot M,  
776 Duchesnay É (2011) Scikit-learn: Machine Learning in Python. *J Mach Learn Res*  
777 12:2825–2830.

- 778 Pfeffer T, Avramiea A-E, Nolte G, Engel AK, Linkenkaer-Hansen K, Donner TH (2017)  
779 Catecholamines Alter the Intrinsic Variability of Cortical Population Activity and  
780 Perception. *Neuroscience*. Available at: <http://biorxiv.org/lookup/doi/10.1101/170613>  
781 [Accessed June 11, 2019].
- 782 Pizzarelli R, Cherubini E (2011) Alterations of GABAergic Signaling in Autism Spectrum  
783 Disorders. *Neural Plast* Available at: <https://www.hindawi.com/journals/np/2011/297153/>  
784 [Accessed October 26, 2019].
- 785 Power JD, Plitt M, Gotts SJ, Kundu P, Voon V, Bandettini PA, Martin A (2018) Ridding fMRI  
786 data of motion-related influences: Removal of signals with distinct spatial and physical  
787 bases in multiecho data. *Proc Natl Acad Sci U S A* 115:E2105–E2114.
- 788 Remington A, Swettenham J, Campbell R, Coleman M (2009) Selective Attention and  
789 Perceptual Load in Autism Spectrum Disorder. *Psychol Sci* 20:1388–1393.
- 790 Revelle W (2019) *psych: Procedures for Psychological, Psychometric, and Personality*  
791 *Research*. Available at: <https://CRAN.R-project.org/package=psych> [Accessed May 25,  
792 2019].
- 793 Robertson CE, Kravitz DJ, Freyberg J, Baron-Cohen S, Baker CI (2013) Slower Rate of  
794 Binocular Rivalry in Autism. *J Neurosci* 33:16983–16991.
- 795 Robertson CE, Ratai E-M, Kanwisher N (2016) Reduced GABAergic Action in the Autistic Brain.  
796 *Curr Biol* CB 26:80–85.
- 797 Rosenberg A, Patterson JS, Angelaki DE (2015) A computational perspective on autism. *Proc*  
798 *Natl Acad Sci U S A* 112:9158–9165.
- 799 Samardzic J, Jadzic D, Hencic B, Strac JJ and DS (2018) Introductory Chapter:  
800 GABA/Glutamate Balance: A Key for Normal Brain Functioning. *GABA Glutamate - New*  
801 *Dev Neurotransmission Res* Available at: [https://www.intechopen.com/books/gaba-and-](https://www.intechopen.com/books/gaba-and-glutamate-new-developments-in-neurotransmission-research/introductory-chapter-gaba-glutamate-balance-a-key-for-normal-brain-functioning)  
802 *glutamate-new-developments-in-neurotransmission-research/introductory-chapter-gaba-*  
803 *glutamate-balance-a-key-for-normal-brain-functioning* [Accessed October 26, 2019].
- 804 Servan-Schreiber D, Printz H, Cohen JD (1990) A network model of catecholamine effects:  
805 gain, signal-to-noise ratio, and behavior. *Science* 249:892–895.
- 806 Sinha P, Kjelgaard MM, Gandhi TK, Tsourides K, Cardinaux AL, Pantazis D, Diamond SP, Held  
807 RM (2014) Autism as a disorder of prediction. *Proc Natl Acad Sci* 111:15220–15225.
- 808 Sur M, Rubenstein JLR (2005) Patterning and plasticity of the cerebral cortex. *Science*  
809 310:805–810.
- 810 Urai AE, Braun A, Donner TH (2017) Pupil-linked arousal is driven by decision uncertainty and  
811 alters serial choice bias. *Nat Commun* 8:14637.
- 812 Uzunova G, Pallanti S, Hollander E (2016) Excitatory/inhibitory imbalance in autism spectrum  
813 disorders: Implications for interventions and therapeutics. *World J Biol Psychiatry*  
814 17:174–186.



- 815 Wagenmakers E-J (2007) A practical solution to the pervasive problems of p values. *Psychon*  
816 *Bull Rev* 14:779–804.
- 817 Wickham H, François R, Henry L, Müller K, RStudio (2019) *dplyr: A Grammar of Data*  
818 *Manipulation*. Available at: <https://CRAN.R-project.org/package=dplyr> [Accessed May  
819 25, 2019].
- 820 Williams DL, Goldstein G, Carpenter PA, Minshew NJ (2005) Verbal and Spatial Working  
821 Memory in Autism. *J Autism Dev Disord* 35:747.
- 822 Zekveld AA, Koelewijn T, Kramer SE (2018) The Pupil Dilation Response to Auditory Stimuli:  
823 Current State of Knowledge. *Trends Hear* 22 Available at:  
824 <https://www.ncbi.nlm.nih.gov/pmc/articles/PMC6156203/> [Accessed June 23, 2019].
- 825 Zhou S, Yu Y (2018) Synaptic E-I Balance Underlies Efficient Neural Coding. *Front Neurosci* 12  
826 Available at: <https://www.frontiersin.org/articles/10.3389/fnins.2018.00046/full> [Accessed  
827 October 26, 2019].
- 828
